1 **Multiple environmental parameters impact core lipid cyclization in *Sulfolobus acidocaldarius***

2  
3 Alec Cobban<sup>a,b,\*</sup>, Yujiao Zhang<sup>a,c</sup>, Alice Zhou<sup>a,#</sup>, Yuki Weber<sup>^,d</sup>, Ann Pearson<sup>d</sup>, William D. Leavitt<sup>a,b,e,\*</sup>

4  
5 <sup>a</sup>. Department of Earth Sciences, Dartmouth College, Hanover, NH 03755 USA

6 <sup>b</sup>. Department of Biological Sciences, Dartmouth College, Hanover, NH 03755 USA

7 <sup>c</sup>. State Key Laboratory of Organic Geochemistry, Guangzhou Institute of Geochemistry, Chinese Academy  
8 of Sciences, Guangzhou 510640 China

9 <sup>d</sup>. Department of Earth & Planetary Sciences, Harvard University, Cambridge, MA 02138 USA

10 <sup>e</sup>. Department of Chemistry, Dartmouth College, Hanover, NH 03755 USA

11  
12 \*Correspondence authors e-mail addresses: [alec.bradley.cobban@dartmouth.edu](mailto:alec.bradley.cobban@dartmouth.edu),

13 [william.d.leavitt@dartmouth.edu](mailto:william.d.leavitt@dartmouth.edu)

14 Key Words: GDGT; ring index; thermoacidophile; temperature; pH; growth rate

15 Current Address: <sup>#</sup>Department of Earth Science, University of Michigan; <sup>^</sup>Greenlight Biosciences Inc.,  
16 Medford, MA

17  
18 **ABSTRACT**

19 **Environmental reconstructions based on microbial lipids require understanding the coupling**  
20 **between environmental conditions and membrane physiology. The paleotemperature proxy TEX<sub>86</sub> is**  
21 **built on the observation that archaea alter the number of five- and six-membered rings in the**  
22 **hydrophobic core of their glycerol dibiphytanyl glycerol tetraether (GDGT) membrane lipids when**  
23 **growing at different temperatures. However, recent work with these archaea also highlights a role**  
24 **for other factors, such as pH or energy availability in determining the degree of core lipid cyclization.**  
25 **To better understand the role of these variables we cultivated a model Crenarchaeon, *Sulfolobus***  
26 ***acidocaldarius*, over a range in temperature, pH, oxygen flux, or agitation speed, and quantified the**  
27 **changes in growth rate, biomass yield, and core lipid compositions. The average degree of cyclization**  
28 **in core lipids correlated with growth rate under most conditions. When considered alongside other**  
29 **experimental findings from both the thermoacidophilic and mesoneutrophilic archaea, the results**  
30 **suggest the cyclization of archaeal lipids records a universal response to energy availability at the**  
31 **cellular level. Although we isolated the effects of individual parameters, there remains a need for**  
32 **multi-factor experiments (e.g., pH + temperature + redox) to establish a robust framework to**  
33 **interpret biomarker records of environmental change.**

## 34 **1.0 Introduction**

35 Key taxa from the domain Archaea produce membranes partly or mostly composed of the geostable  
36 lipid biomarkers, glycerol dibiphytanyl glycerol tetraether (GDGTs (1, 2). Archaea that produce GDGTs  
37 maintain optimal membrane fluidity and permeability by altering the number of cyclopentyl and/or  
38 cyclohexyl rings within the tetraether core (3). Early work with thermoacidophilic archaea showed that  
39 temperature influences GDGT ring abundance (4, 5), which formed the basis for using GDGT distributions  
40 as a paleotemperature proxy, known as TEX<sub>86</sub> (6). Early studies also implicated pH and oxidant availability  
41 in altering ring abundance (5, 7). Recent work with marine mesoneutrophilic Thaumarchaeota showed that  
42 electron donor or acceptor availability is an important determinant of GDGT cyclization (8, 9), and work  
43 with thermoacidophilic Crenarchaeota demonstrated that shifts in pH, temperature, growth phase, or  
44 electron donor availability also resulted in different degrees of GDGT cyclization (10–14). These changes  
45 in GDGT composition highlight the need for cells to maintain membrane fluidity and permeability within  
46 an operative range (15, 16). Modelling studies show that cyclization of GDGTs increases the degree of  
47 membrane packing by bringing both the isoprenoid chains and polar head groups closer together (17).  
48 Tighter membrane packing may be one of the many strategies archaea evolved to survive chronic energy  
49 stress (18). It follows that not only temperature, but also the other major environmental variables that play  
50 a significant role in determining membrane composition, must be considered in order to understand GDGT-  
51 based reconstructions of past conditions.

52 To better interpret GDGT ring abundance in response to environmental change we cultivated the  
53 model thermoacidophile, *Sulfolobus acidocaldarius* DSM639 (hereafter DSM639), under different regimes  
54 of pH, temperature, physical perturbation, or oxygen availability. This model organism grows quickly and  
55 to high densities, has the ability to grow under different culture conditions, has a suite of genetic tools  
56 available for downstream manipulation (19), and has a known biochemical mechanism of ring cyclization  
57 (20). In this study we quantified core GDGTs and the average abundance of cyclopentyl rings, as well as  
58 growth parameters such as doubling time and biomass yield. We observed clear trends between growth rate  
59 and ring abundance across all conditions. Under cultivation conditions farthest from the organismal

60 optimum, DSM639 produced several additional GDGT isomers in addition to the typical suite of GDGTs.  
61 We discuss the implications for batch and bioreactor-based cultivation efforts and highlight the need for  
62 multiparameter studies going forward.

63

## 64 **2.0 Methods**

65 Axenic cultures of DSM639 were cultivated in either batch cultures exchanging with the  
66 atmosphere or in closed, gas-fed batches. Medium was prepared following Wagner et al. (2012), with  
67 sucrose (0.2% w/v) and oxygen as the electron donor/acceptor pair. In closed batch experiments a single  
68 parameter was varied per experiment – temperature (65, 70, 75 and 80 °C), pH (2, 3, 4), or shaking speed  
69 (0, 50, 61, 75, 97, 125, 200 or 300 RPM) – where default “optimal” parameters were 70 °C, pH 3, and 200  
70 RPM. Five biological replicates were cultivated per condition. Atmospheric batch experiments were  
71 performed in temperature-controlled shaking incubators (Innova42 New Brunswick, Eppendorf,  
72 Hauppauge NY, USA), using the incubator’s digital control for maintenance of both temperature and  
73 shaking speed. Evaporation was minimized by maintaining large trays of water in the incubator to saturate  
74 the atmosphere. Gas fed-batch experiments were performed in three 1-L glass bioreactors using myControl  
75 PID controllers (Applikon, Delft, Netherlands). In all gas-fed batch experiments the following parameters  
76 were held constant: temperature of 70 °C, impeller speed of 200 RPM, gas flux of 200 mL per min, and pH  
77 3. Strain DSM639 was pre-cultured in batch prior to inoculation into gas fed-batch reactors. The sparge gas  
78 contained oxygen partial pressures of either 0.2, 0.5, 1.0, 2.0 or 20 % (balance N<sub>2</sub>). When DSM639 was  
79 grown on 0.2% O<sub>2</sub> it underwent fewer than 2 generations before entering stationary phase. Due to the  
80 concern that the harvested biomass was significantly influenced by the inoculum, we performed a second  
81 (subculture) run on 0.2% O<sub>2</sub>, where two reactors of fresh 0.2% O<sub>2</sub>-sparged media were inoculated with late-  
82 logarithmic phase cells from an initial 0.2% O<sub>2</sub> experiment. Growth was determined by optical density  
83 measurements at 600 nm.

84 Biomass for lipids was harvested in early stationary phase for atmospheric batch conditions, and  
85 both late logarithmic and early stationary phase for gas-fed batch (*Figure 1*). Biomass samples were pelleted  
86 by centrifugation, frozen at -80°C, and freeze-dried prior to lipid extraction. Core lipid fractions were

87 obtained and analyzed as previously detailed (13, 21). Specific growth rates were calculated by a modified  
88 implementation of the algorithm in Hall et al. (2014). Rate calculation script is available on GitLab (see  
89 Supplement). GDGT abundances were measured by ultra-high-performance liquid chromatography  
90 (UHPLC) coupled to an Agilent 6410 triple-quadrupole mass spectrometer (MS) as previously described  
91 (13). Ring indices (RI) were calculated using Eq 1. based on peak areas of GDGTs as modified from ref.  
92 (22).

$$93 \quad RI = \frac{1*[GDGT-1] + 2*[GDGT-2] + 3*[GDGT-3] + 4*[GDGT-4] + 5*[GDGT-5] + 6*[GDGT-6] + 7*[GDGT-7] + 8*[GDGT-8]}{[GDGT-0] + [GDGT-1] + [GDGT-2] + [GDGT-3] + [GDGT-4] + [GDGT-5] + [GDGT-6] + [GDGT-7] + [GDGT-8]} \quad (1)$$

94 Multiple isomers of GDGTs- 3, 4 and 5 were detected in some experiments, similar to samples from ref.  
95 (13). The peak areas of the minor isomers were summed with their respective major components (e.g.,  
96 GDGT-3 + GDGT-3') before calculating RI.

97 A three-way Type II analysis of variance (ANOVA) was run on GDGT relative abundances for  
98 the atmospheric batch experiments. A one-way Type II ANOVA was run on relative abundances of each  
99 GDGT for oxygen concentration experiments. Non-metric multidimensional scaling (NMDS) analyses  
100 were conducted for both atmospheric batch and gas-fed batch experiments using the Bray-Curtis  
101 dissimilarity of the absolute abundances of each GDGT, and the first two dimensions were plotted. Code  
102 for all statistical analyses is available on GitLab ([https://git.dartmouth.edu/leavitt\\_lab/cobban-saci-lipids-  
103 batch-and-fed-batch-2020](https://git.dartmouth.edu/leavitt_lab/cobban-saci-lipids-batch-and-fed-batch-2020)).

104

### 105 **3.0 Results**

106 DSM639 grew faster and to generally higher terminal densities at higher shaking speeds (Figure  
107 1A), higher temperatures (Figure 1B), and at higher oxygen partial pressures (Figure 1D). DSM639 was  
108 less noticeably sensitive to pH (Figure 1C); its growth optimum is thought to be pH 3 (23), although we  
109 observed similar growth rates at all three pH values and higher biomass yields at pH 2 and 4. The GDGT  
110 distributions from all replicates are shown in Figure 2 and Table S1. Some conditions yielded multiple  
111 isomers of GDGTs 3, 4 and 5, previously seen only in chemostats under energy limitation (13). These extra

112 isomers were observed at higher temperatures (75 and 80°C; Figure 2A), low pH (Figure 2B), shaking  
113 speeds above 125 RPM (Figure 2C), and under oxygen partial pressures below 0.5% O<sub>2</sub>.

114 We performed statistical analyses to determine how each GDGT was individually impacted by  
115 changing culture conditions. Main effects ANOVA was performed on GDGT relative abundances for each  
116 experimental condition (Table 1). Temperature correlated with significant variation in relative abundances  
117 of all GDGTs except for GDGT-0, 1 and the isomer of GDGT-3. Shaking speed was associated with  
118 significant variation in all relative abundances except GDGT-3, the GDGT-3 isomer, GDGT-7, and GDGT-  
119 8. In response to pH, all GDGTs varied significantly except for GDGT-0, -1, -2, -7 and -8. Oxygen flux  
120 caused variation in all observed GDGTs, except GDGT-0, -3, -3 isomer, and -4. We also reanalyzed data  
121 from a recent chemostat experiment we performed with DSM639 (13), finding that growth rate  
122 significantly correlated with the relative abundance of all GDGTs, except GDGT-3 isomer. Considering in  
123 aggregate our atmospheric batch, gas-fed batch, and chemostat experiments with DSM639, our results  
124 demonstrate that each physical variable can independently influence different subsets of GDGT core lipids.

125 Doubling time and RI were determined from each replicate under each condition (Figure 3). As  
126 temperature increased, doubling time decreased and RI increased (Figure 3A and 3E). Doubling was fastest  
127 at pH 3, slightly slower as pH 2, and slowest at pH 4, while RI was highest at pH 3, lower at pH 2 and  
128 lowest at pH 4 (Figure 3B and 3F). Growth was faster and RI increased along with shaking speed from 50  
129 to 200 RPM, with exceptions at 0 and 300RPM (Figure 3C and 3G). In gas-fed experiments, growth was  
130 the slowest at 0.2% O<sub>2</sub>, faster at 0.5, 1.0 and 2 % O<sub>2</sub>, and fastest at 20% O<sub>2</sub>. In these experiments RI was  
131 highest at 20% O<sub>2</sub>, then dropped as % O<sub>2</sub> decreased to 0.5 %, but then increased again at the lowest O<sub>2</sub>  
132 concentration of 0.2 % (Figure 3D and 3H).

133 The RI results from each experimental condition were compared using doubling time as the  
134 reference variable (Figure 4). Interestingly, linear regressions for all of these different experimental  
135 conditions coalesce around a pattern of negative correlation between RI and doubling time in atmospheric  
136 batch experiments (Figure 4A-C), but positive correlation between RI and doubling time in gas fed-batch  
137 and chemostat experiments (Figure 4D and Figure 4E).

138 Differences in core GDGT composition between samples was compared via NMDS using Bray-  
139 Curtis dissimilarity, separately for atmospheric batch, fed-batch, and chemostat cultivation experiment  
140 (Figures 5 and 6). In batch conditions there is visually distinct clustering of samples based on temperature,  
141 pH, or shaking speed (Figure 5). Closer points on the NMDS are more similar in overall GDGT composition  
142 than they are to points farther away. This approach can identify unique GDGT distributions in samples  
143 which may otherwise appear similar in terms of consolidated metrics, such as RI. In gas fed-batch  
144 experiments, separate clusters can be seen based on both growth phase and oxygen concentration (Figure  
145 6A). In chemostat experiments from Zhou et al. (2019) clusters seem to arise based on doubling times  
146 (Figure 6B). Stress values for all conditions are plotted on each NMDS plot, and were all below 0.05,  
147 indicating a good fit of the original data to the two-dimensional ordination.

148

#### 149 **4.0 Discussion**

150 Our studies of the model thermoacidophile DSM639 are broadly consistent with prior data, including  
151 work on other thermoacidophilic Crenarchaeota as well as the more distantly related mesoneutrophilic  
152 Thaumarchaeota. The results support the previously demonstrated roles of pH, temperature, and oxygen  
153 (electron acceptor) availability in affecting core GDGT composition. We further examine, for the first time,  
154 the impact of agitation on GDGT cyclization. Higher temperatures yielded higher average cyclization,  
155 which is consistent with most experimental studies of both Thaum- and Crenarchaeota (9–12, 24, 25), yet  
156 opposes recent environmental findings in alkaline hot springs (26). When pH deviated from the optimum  
157 pH of ~3 for DSM639, cyclization decreased. Whereas prior thermoacidophile studies showed that  
158 cyclization primarily decreased with increases in pH (10, 11, 25), we observed decreased cyclization when  
159 the pH was both above and below optimal. Despite the similarity in RI values at pH 2 and pH 4, the  
160 composition of GDGTs at each pH also was distinct (Figure 2, Figure 5). GDGT profiles contained more  
161 of both the higher and lower ring-numbered GDGTs at pH 2, but showed more of the moderately cyclized  
162 (GDGT-3, -4) compounds at pH 4. These observations highlight that differences in GDGT composition are  
163 not always captured by RI values. The results of ANOVA show that all conditions tested had a significant  
164 effect on a unique subset of GDGTs, as opposed to unidirectional or single-pattern control over the total

165 lipid composition (Table 1). This makes it difficult to assess the robustness of uniform metrics that  
166 consolidate GDGT composition data into a single value, e.g., RI or TEX<sub>86</sub>. This complication affects  
167 application of such index values to environments in which there may be multiple variables experiencing  
168 simultaneous shifts caused by different environmental drivers (e.g., ref. (27)).

169 To our knowledge, this study is the first to specifically address the effects of agitation speed on  
170 GDGT composition. Shaking of microbial cultures is classically believed to provide aeration and increase  
171 oxygen availability. However, we saw contradictory trends in RI as a function of shaking speed, with  
172 outlying data at 0 and 300 RPM (Figure 3G). Between these ranges, however, RI increased as growth rates  
173 and shaking speed increased. The inconsistent response to shaking, along with discrepancies within  
174 the % O<sub>2</sub> experiments, as discussed below, suggests that the effects of shaking are not solely tied to O<sub>2</sub>  
175 availability in the growth medium. A previous study in another model taxon suggested that shaking,  
176 independent of aeration, affects growth by inducing stress caused by physical interaction with the  
177 environment (28). Physical stress may have caused the anomalous trend at 300 RPM, while the trend at 0  
178 RPM may reflect O<sub>2</sub>-limitation (similar to the 0.2% O<sub>2</sub> experiment, Figure 3H).

179 The oxygen partial pressure experiments expand on the existing understanding of GDGT response  
180 to electron acceptor availability. Our data are consistent with recent batch experiments performed on  
181 mesoneutrophilic Thaumarchaeota, where RI generally decreased with initial headspace % O<sub>2</sub> (9). All such  
182 experiments (ours and ref. (9)) were isothermal, of constant pH, and tested similar ranges of % O<sub>2</sub>. Taken  
183 together, these data show that two distinct groups of archaea both exhibit consistent responses of lipid  
184 composition to trends in O<sub>2</sub> partial pressures. Importantly, both our data and the results from Qin and  
185 colleagues (9) differ from the agitation speed experiments, which show the opposite relationship between  
186 RI and growth rate. The oxygen limitation experiments performed here were mixed with an impeller, while  
187 those from Qin and colleagues (9) were performed without shaking – in both cases, electron-acceptor  
188 availability was modified without altering the other environmental factors that may otherwise change in the  
189 agitation speed experiments. From the variation in RI in these experiment types, it seems possible that  
190 higher ring indices are associated with higher metabolic energy stress and mechanical/environmental  
191 stresses.

192 Growth rate and ring index broadly covary, independent of which variable is causing this forcing  
193 (Figure 4). The temperature, pH and shaking speed experiments show inverse trends between growth rate  
194 and RI, consistent with batch experiments in the existing Thaumarchaeota (Figure S1) and Crenarchaeota  
195 (Figure S2) literature (11, 12, 29). However, these trends directly oppose results from other experiments  
196 characterizing GDGT response to pH in thermoacidophiles (11). It is possible that the fastest growth  
197 conditions in batch culture are those with high environmental or energetic stress (high temperature/shaking  
198 speed), and this increase in stress necessitates generally higher cyclization for the cells to maintain  
199 homeostasis. For pH, it is possible that GDGT distribution may be changing in a way that is not best  
200 recorded by RI, leading to a lack of consistent trends when only these simple index values are reported. The  
201 gas-fed batch experiments showed consistent positive trends between RI and doubling time (more rings at  
202 slower growth rate) as in other bioreactor-based experiments with both thermoacidophiles and ammonia  
203 oxidizing archaea (8, 13). Because the bioreactor-based experiments vary only in electron donor or  
204 acceptor availability, – i.e., have constant physical conditions, pH, and growth stage – the environmental  
205 stresses across each set of experiments should be equivalent. Thus, the growth rates and RI values of  
206 bioreactor experiments specifically are responding to variations in energy supply and demand. Cell  
207 responses, including extent of GDGT cyclization, should be tied to energy availability. This disconnect  
208 between energy availability versus a mixture of environmental stressors may be at the root of the opposing  
209 trends of RI vs. growth rates for batch (Figure 4 A, B, C) and bioreactor (Figure 4 D, E; refs. 8, 13)  
210 experiments.

211 The occurrence of multiple isomers of a GDGT (e.g., GDGT-3 and GDGT-3') consistently  
212 occurred when DSM639 was cultivated under conditions we interpret as the most physiologically stressful.  
213 Namely, the isomers were most abundant at the lowest pH, highest temperature, highest shaking speed, and  
214 lowest oxygen concentrations (Figure 2). It is possible that these isomers were produced as part of a generic  
215 cellular stress response, or that they have different physical properties that are advantageous in less  
216 hospitable living conditions.

217 Finally, the overall distribution of lipids changed dramatically in response to shifts in temperature,  
218 pH, shaking speed or oxygen concentration in directions that were not reflected by RI alone. The clearest



219 example of this is the response to pH (Figure 2B), where the pH 2 and 4 experiments were more similar in  
220 RI value than they were to the RI value for pH 3, but differed markedly in their GDGT distributions. This  
221 may indicate that despite having similar RI values, their associated lipid profiles incorporated different  
222 mixtures of GDGTs that could have opposing effects on membrane fluidity and permeability. This  
223 observation highlights how taking the weighted average of GDGTs in a measurement like RI can mask  
224 variance. It is critical to note this when considering shifts in RI in natural systems where independent  
225 measures of pH, temperature, or oxygen availability, for example, may not be available.

226 GDGT cyclization by both thermoacidophile and mesoneutrophile archaea reflects strain-specific  
227 membrane optimization to a wide array of environmental perturbations. Insights from experiments such as  
228 our present work are supported by observations from redox-stratified marine and terrestrial systems where  
229 either electron donor or acceptor availability, or other major parameters such as temperature or pH, are  
230 statistically correlated with shifts in GDGT composition (30–35). Resolving how environmental parameters  
231 trigger archaea to vary their degree of GDGT cyclization in complex systems remains a core challenge.

232

## 233 **5.0 Conclusions**

234 Our experiments indicate that Crenarchaeota alter their membrane lipid composition in response to  
235 temperature, pH, shaking speed, and oxygen concentration. Higher physical stress (high  
236 temperatures/shaking speeds) and lower energy availability (low % O<sub>2</sub>) were mostly associated with higher  
237 RI values, while sub- and super-optimal pH caused a variety of changes to lipid composition that were not  
238 visible in consolidated RI values. This physiological plasticity likely allows cells to maintain optimal  
239 membrane fluidity and permeability, as well as minimize energy loss, when confronted with chemical and  
240 physical stress. This survival strategy of varying GDGT cyclization in response to a variety of  
241 environmental challenges is common to the Cren- and Thaumarchaeota; such observations ultimately  
242 support Valentine's hypothesis (17) that the unifying physiological and evolutionary feature of the archaeal  
243 domain is the ability to persist under conditions of chronic energy stress. Expanding the experimental matrix  
244 tested here is a priority going forward to better constrain the covariate interactions of these environmental  
245 conditions in affecting GDGT profiles. This is more easily done in the thermoacidophiles due to their ease

246 of cultivation, but ultimately must be extended to the Thaumarchaeota and to mixed assemblages, in order  
247 to better understand paleoenvironmental proxies such as TEX<sub>86</sub>.

248

## 249 **6.0 Supplementary information, Data and Code.**

250 All supplemental code and data available online:

251 [https://git.dartmouth.edu/leavitt\\_lab/cobban-saci-lipids-batch-and-fed-batch-2020](https://git.dartmouth.edu/leavitt_lab/cobban-saci-lipids-batch-and-fed-batch-2020)

252 Figures and dataframes are also available at:

253 <https://doi.org/10.6084/m9.figshare.c.4863426.v1>

254

## 255 **7.0 Acknowledgments**

256 Funding was provided by the American Chemical Society PRF #57209-DNI2 (WDL), the Walter and  
257 Constance Burke Fund at Dartmouth College (WDL), and Dartmouth College Undergraduate Advising and  
258 Research (UGAR) at Dartmouth (AC); the Visiting PhD Research program Fund at Guangzhou Institute of  
259 Geochemistry (YZ); the Swiss National Science Foundation P2BSP2\_168716 (YW); NSF OCE-1843285  
260 and OCE-1702262 (AP). We thank Sonja Albers at the University of Freiburg for providing *S.*  
261 *acidocaldarius* DSM639, Beverly Chiu for editorial and laboratory assistance, and Dr. Felix Elling for  
262 assistance with GDGT analyses.

263

264

265

## 266 **8.0 References**

- 267 1. Pearson A, Ingalls AE. 2013. Assessing the Use of Archaeal Lipids as Marine  
268 Environmental Proxies. *Annu Rev Earth Planet Sci* 41:359–384.
- 269 2. Schouten S, Hopmans EC, Sinninghe Damsté JS. 2013. The organic geochemistry of  
270 glycerol dialkyl glycerol tetraether lipids: A review. *Org Geochem* 54:19–61.
- 271 3. Gliozzi A, Relini A, Chong PL-G. 2002. Structure and permeability properties of  
272 biomimetic membranes of bolaform archaeal tetraether lipids. *J Membr Sci* 206:131–147.

- 273 4. De Rosa M, Esposito E, Gambacorta A, Nicolaus B, Bu'Lock JD. 1980. Effects of  
274 temperature on ether lipid composition of *Caldariella acidophila*. *Phytochemistry* 19:827–  
275 831.
- 276 5. De Rosa M, Gambacorta A. 1988. The lipids of archaeobacteria. *Prog Lipid Res* 27:153–175.
- 277 6. Schouten S, Hopmans EC, Schefuß E, Sinninghe Damsté JS. 2002. Distributional variations  
278 in marine crenarchaeotal membrane lipids: a new tool for reconstructing ancient sea water  
279 temperatures? *Earth Planet Sci Lett* 204:265–274.
- 280 7. Zillig W, Holz I, Janekovic D, Schäfer W, Reiter WD. 1983. The Archaeobacterium  
281 *Thermococcus celer* Represents, a Novel Genus within the Thermophilic Branch of the  
282 Archaeobacteria. *Syst Appl Microbiol* 4:88–94.
- 283 8. Hurley SJ, Elling FJ, Könneke M, Buchwald C, Wankel SD, Santoro AE, Lipp JS, Hinrichs  
284 K-U, Pearson A. 2016. Influence of ammonia oxidation rate on thaumarchaeal lipid  
285 composition and the TEX86 temperature proxy. *Proc Natl Acad Sci* 113:7762–7767.
- 286 9. Qin W, Carlson LT, Armbrust EV, Devol AH, Moffett JW, Stahl DA, Ingalls AE. 2015.  
287 Confounding effects of oxygen and temperature on the TEX86 signature of marine  
288 Thaumarchaeota. *Proc Natl Acad Sci* 112:10979–10984.
- 289 10. Boyd ES, Pearson A, Pi Y, Li W-J, Zhang YG, He L, Zhang CL, Geesey GG. 2011.  
290 Temperature and pH controls on glycerol dibiphytanyl glycerol tetraether lipid composition  
291 in the hyperthermophilic crenarchaeon *Acidilobus sulfurireducens*. *Extremophiles* 15:59–  
292 65.

- 293 11. Feyhl-Buska J, Chen Y, Jia C, Wang J-X, Zhang CL, Boyd ES. 2016. Influence of growth  
294 phase, pH, and temperature on the abundance and composition of tetraether lipids in the  
295 Thermoacidophile *Picrophilus torridus*. *Front Microbiol* 7:1323.
- 296 12. Jensen SM, Neesgaard VL, Skjoldbjerg SLN, Brandl M, Ejsing CS, Treusch AH. 2015. The  
297 Effects of Temperature and Growth Phase on the Lipidomes of *Sulfolobus islandicus* and  
298 *Sulfolobus tokodaii*. *Life* 5:1539–1566.
- 299 13. Zhou A, Weber Y, Chiu BK, Elling FJ, Cobban AB, Pearson A, Leavitt WD. 2019. Energy  
300 flux controls tetraether lipid cyclization in *Sulfolobus acidocaldarius*. *Environ Microbiol*  
301 22:343–353.
- 302 14. Quehenberger J, Pittenauer E, Allmaier G, Spadiut O. 2020. The influence of the specific  
303 growth rate on the lipid composition of *Sulfolobus acidocaldarius*. *Extremophiles*.
- 304 15. Oger PM, Cario A. 2013. Adaptation of the membrane in Archaea. *Biophys Chem* 183:42–  
305 56.
- 306 16. van de Vossenberg JL, Driessen AJ, Konings WN. 1998. The essence of being  
307 extremophilic: the role of the unique archaeal membrane lipids. *Extremophiles* 2:163–170.
- 308 17. Shimada H, Nemoto N, Shida Y, Oshima T, Yamagishi A. 2008. Effects of pH and  
309 Temperature on the Composition of Polar Lipids in *Thermoplasma acidophilum* HO-62. *J*  
310 *Bacteriol* 190:5404–5411.
- 311 18. Valentine DL. 2007. Opinion: Adaptations to energy stress dictate the ecology and  
312 evolution of the Archaea. *Nat Rev Microbiol* 5:316–323.

- 313 19. Wagner M, van Wolferen M, Wagner A, Lassak K, Meyer BH, Reimann J, Albers S-V.  
314 2012. Versatile Genetic Tool Box for the Crenarchaeote *Sulfolobus acidocaldarius*. *Front*  
315 *Microbiol* 3:214.
- 316 20. Zeng Z, Liu X-L, Farley KR, Wei JH, Metcalf WW, Summons RE, Welander PV. 2019.  
317 GDGT cyclization proteins identify the dominant archaeal sources of tetraether lipids in the  
318 ocean. *Proc Natl Acad Sci* 116:22505.
- 319 21. Elling FJ, Könneke M, Nicol GW, Stieglmeier M, Bayer B, Spieck E, de la Torre JR,  
320 Becker KW, Thomm M, Prosser JI. 2017. Chemotaxonomic characterisation of the  
321 thaumarchaeal lipidome. *Environ Microbiol* 19:2681–2700.
- 322 22. Hall BG, Acar H, Nandipati A, Barlow M. 2014. Growth Rates Made Easy. *Mol Biol Evol*  
323 31:232–238.
- 324 23. Grogan DW. 1989. Phenotypic characterization of the archaeobacterial genus *Sulfolobus*:  
325 comparison of five wild-type strains. *J Bacteriol* 171:6710–6719.
- 326 24. Elling FJ, Könneke M, Mußmann M, Greve A, Hinrichs K-U. 2015. Influence of  
327 temperature, pH, and salinity on membrane lipid composition and TEX86 of marine  
328 planktonic thaumarchaeal isolates. *Geochim Cosmochim Acta* 171:238–255.
- 329 25. Kaur G, Mountain BW, Stott MB, Hopmans EC, Pancost RD. 2015. Temperature and pH  
330 control on lipid composition of silica sinters from diverse hot springs in the Taupo Volcanic  
331 Zone, New Zealand. *Extremophiles* 19:327–344.
- 332 26. Boyer GM, Schubotz F, Summons RE, Woods J, Shock EL. 2020. Carbon Oxidation State  
333 in Microbial Polar Lipids Suggests Adaptation to Hot Spring Temperature and Redox  
334 Gradients. *Front Microbiol* 11.

- 335 27. Polik CA, Elling FJ, Pearson A. 2018. Impacts of Paleoecology on the TEX86 Sea Surface  
336 Temperature Proxy in the Pliocene-Pleistocene Mediterranean Sea. *Paleoceanogr*  
337 *Paleoclimatology* 33:1472–1489.
- 338 28. Juergensmeyer MA, Nelson ES, Juergensmeyer EA. 2007. Shaking alone, without  
339 concurrent aeration, affects the growth characteristics of *Escherichia coli*. *Lett Appl*  
340 *Microbiol* 45:179–183.
- 341 29. Elling FJ, Könneke M, Lipp JS, Becker KW, Gagen EJ, Hinrichs K-U. 2014. Effects of  
342 growth phase on the membrane lipid composition of the thaumarchaeon *Nitrosopumilus*  
343 *maritimus* and their implications for archaeal lipid distributions in the marine environment.  
344 *Geochim Cosmochim Acta* 141:579–597.
- 345 30. Hurley SJ, Lipp JS, Close HG, Hinrichs K-U, Pearson A. 2018. Distribution and export of  
346 isoprenoid tetraether lipids in suspended particulate matter from the water column of the  
347 Western Atlantic Ocean. *Org Geochem* 116:90–102.
- 348 31. Pearson A, Pi Y, Zhao W, Li W, Li Y, Inskeep W, Perevalova A, Romanek C, Li S, Zhang  
349 CL. 2008. Factors Controlling the Distribution of Archaeal Tetraethers in Terrestrial Hot  
350 Springs. *Appl Environ Microbiol* 74:3523–3532.
- 351 32. Sollich M, Yoshinaga MY, Häusler S, Price RE, Hinrichs K-U, Bühring SI. 2017. Heat  
352 stress dictates microbial lipid composition along a thermal gradient in marine sediments.  
353 *Front Microbiol* 8:1550.
- 354 33. Weber Y, Damsté JSS, Zopfi J, De Jonge C, Gilli A, Schubert CJ, Lepori F, Lehmann MF,  
355 Niemann H. 2018. Redox-dependent niche differentiation provides evidence for multiple

- 356 bacterial sources of glycerol tetraether lipids in lakes. Proc Natl Acad Sci 115:10926–  
357 10931.
- 358 34. Xie W, Zhang CL, Wang J, Chen Y, Zhu Y, de la Torre JR, Dong H, Hartnett HE, Hedlund  
359 BP, Klotz MG. 2015. Distribution of ether lipids and composition of the archaeal  
360 community in terrestrial geothermal springs: impact of environmental variables. Environ  
361 Microbiol 17:1600–1614.
- 362 35. Zhang Z, Smittenberg RH, Bradley RS. 2016. GDGT distribution in a stratified lake and  
363 implications for the application of TEX<sub>86</sub> in paleoenvironmental reconstructions. Sci Rep  
364 6:34465.
- 365

366  
367368  
369  
370  
371  
372**Table 1: Results of ANOVA for GDGT relative abundances based on variation in experimental conditions**

| Factor                | GDGT.0 | GDGT.1 | GDGT.2 | GDGT.3 | GDGT.3.iso | GDGT.4 | GDGT.4.iso | GDGT.5 | GDGT.5.iso | GDGT.6 | GDGT.7 | GDGT.8 |
|-----------------------|--------|--------|--------|--------|------------|--------|------------|--------|------------|--------|--------|--------|
| Temperature           | NS     | NS     | **     | ***    | NS         | ***    | ***        | ***    | ***        | ***    | ***    | ***    |
| RPM                   | ***    | ***    | ***    | NS     | NS         | ***    | **         | ***    | **         | **     | NS     | NS     |
| pH                    | NS     | NS     | NS     | ***    | ***        | ***    | ***        | **     | ***        | ***    | NS     | NS     |
| O <sub>2</sub> Sparge | NS     | *      | **     | NS     | NS         | ~      | **         | *      | **         | *      | NA     | NA     |
| Doubling Time         | ***    | ***    | ***    | ***    | NS         | ***    | ***        | ***    | ***        | ***    | ***    | ***    |

373  
374  
375

Results of type-II three-way ANOVAs (Temperature, RPM, and pH) and one-way ANOVAs (O<sub>2</sub> sparge and doubling time individually). Data for targeted doubling time are from Zhou et al. (2019). Notations: \*\*\*,  $p < 0.001$ ; \*\*,  $p < 0.01$ ; \*,  $p < 0.05$ ; ~,  $0.05 < p < 0.06$ ; NS,  $p > 0.06$ ; NA, below detection limit.



376  
377

**Figure 1:**

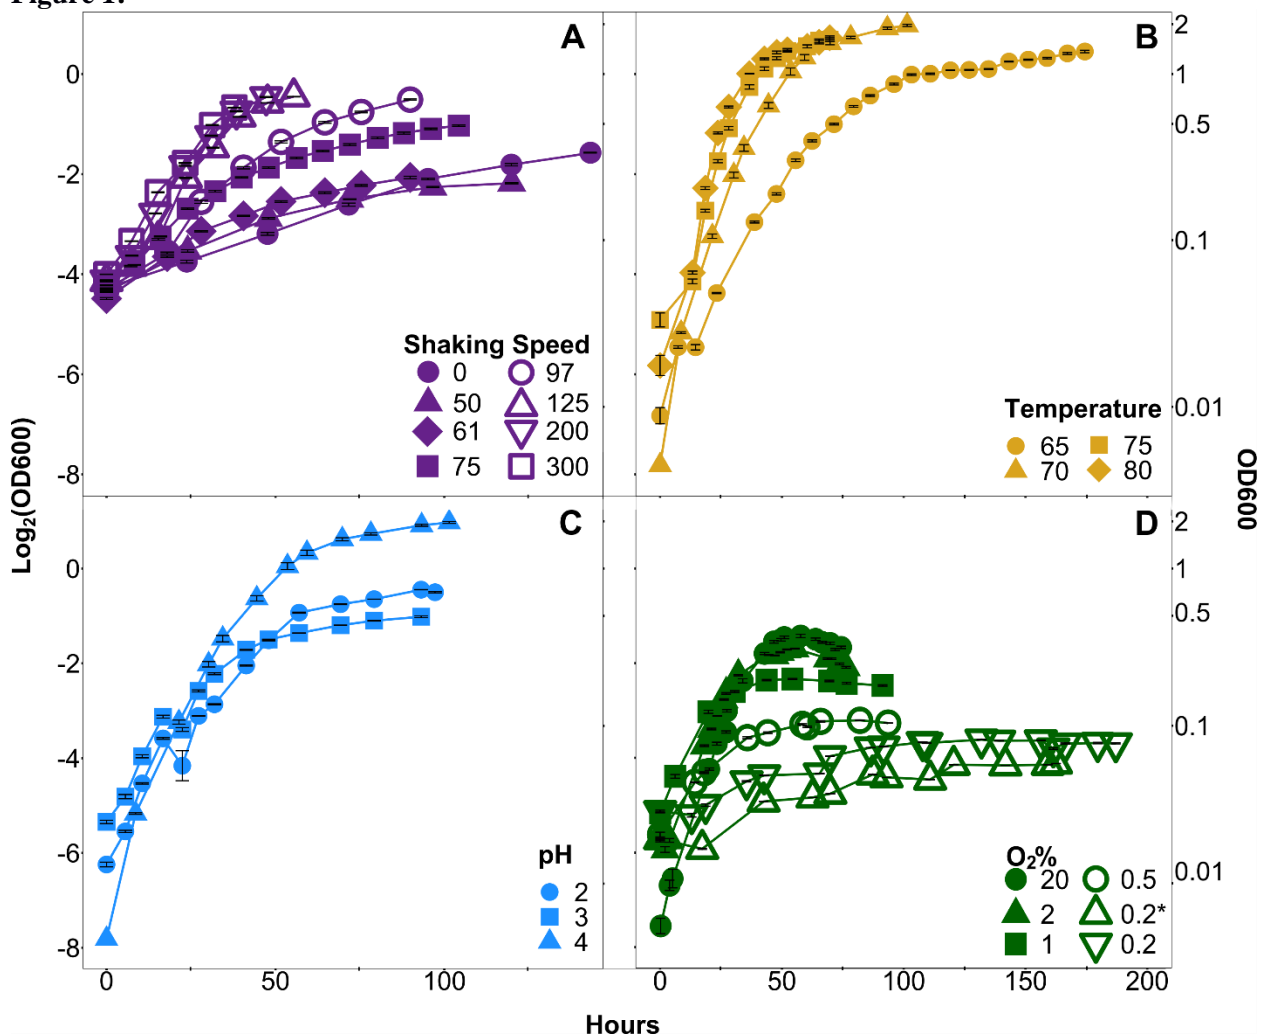

378

379 **Figure 1.** Averaged growth curves from each experiment, plotted as the  $\text{Log}_2(\text{OD}_{600})$  versus time  
380 in hours. (A, B, C) Atmospheric-batch only and (D) gas-fed batch experiments (see methods for  
381 details). Error bars show the mean  $\pm 1$  SE of  $\text{Log}_2(\text{OD}_{600})$  values for the five replicates (A, B, C),  
382 or two to three replicates (D).

383

384 **Figure 2:**

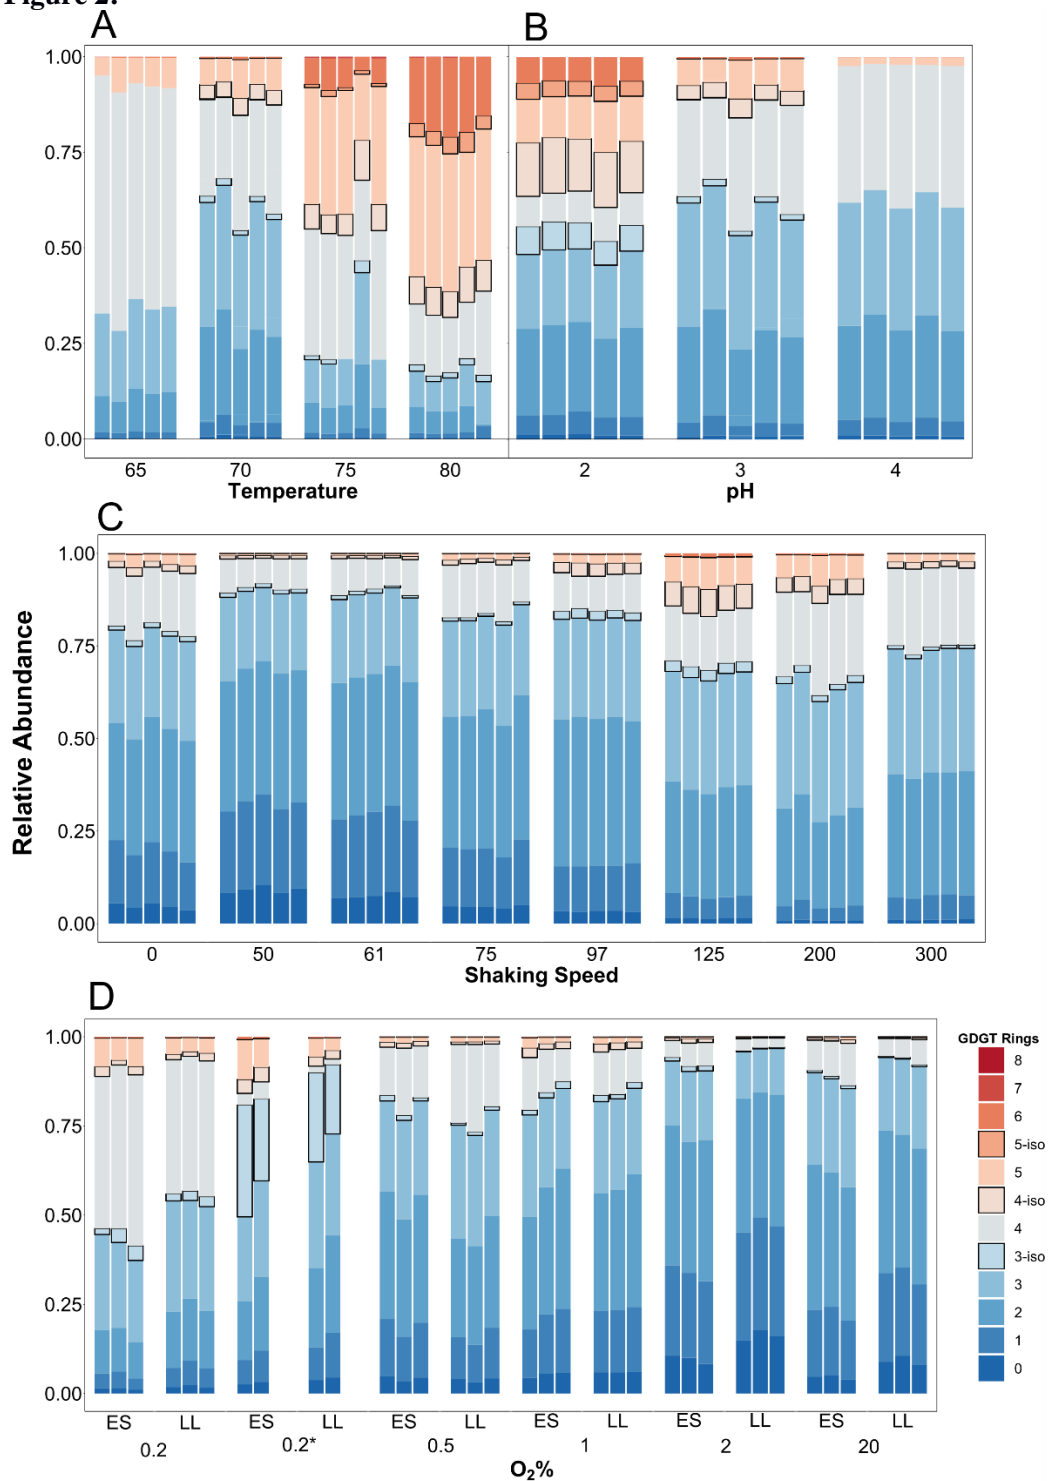

385  
386 **Figure 2.** The core GDGT distribution from each replicate in each experiment. The batch  
387 experiments for temperature (A), pH (B) or shaking speed (C) each had five replicates. The fed-  
388 batch experiments had two or three replicate reactors per sampling, and were sampled in both  
389 Late Logarithmic (LL) and Early Stationary (ES) growth phases. (D). Also in (D), the 0.2\*  
390 denotes the serially transferred 0.2% O<sub>2</sub> experiment (procedure detailed in the methods).

391

392 **Figure 3:**Error! Reference source not found.

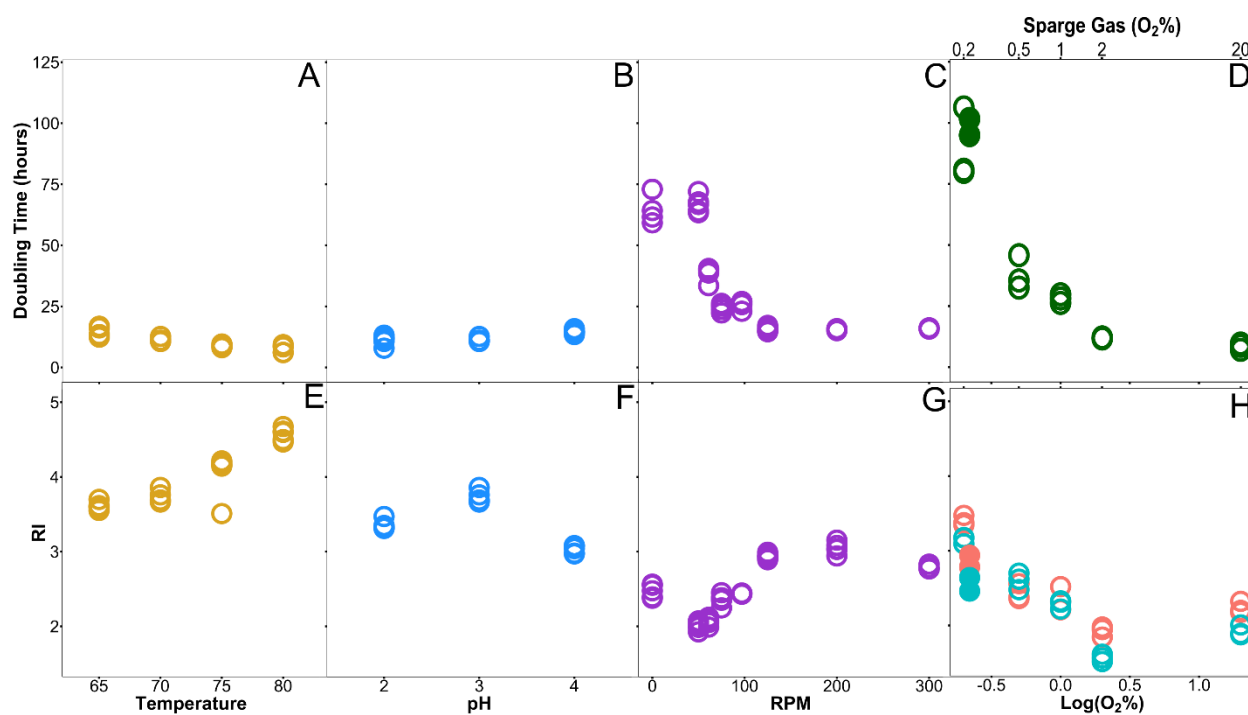

393

394 **Figure 3.** The doubling time (A,B,C,D) or ring index (E,F,G,H) for each set of conditions. Each  
395 point represents a single replicate. The RI in fed-batch experiments (H) was determined both in  
396 late-log phase and early stationary phase and are separated by color coding, with blue and pink  
397 corresponding to Late Log and Early Stationary respectively. At 0.2% O<sub>2</sub>, the serial transfer  
398 experiment is denoted as solid circles for both RI and doubling time  
399

400

401 **Figure 4:**

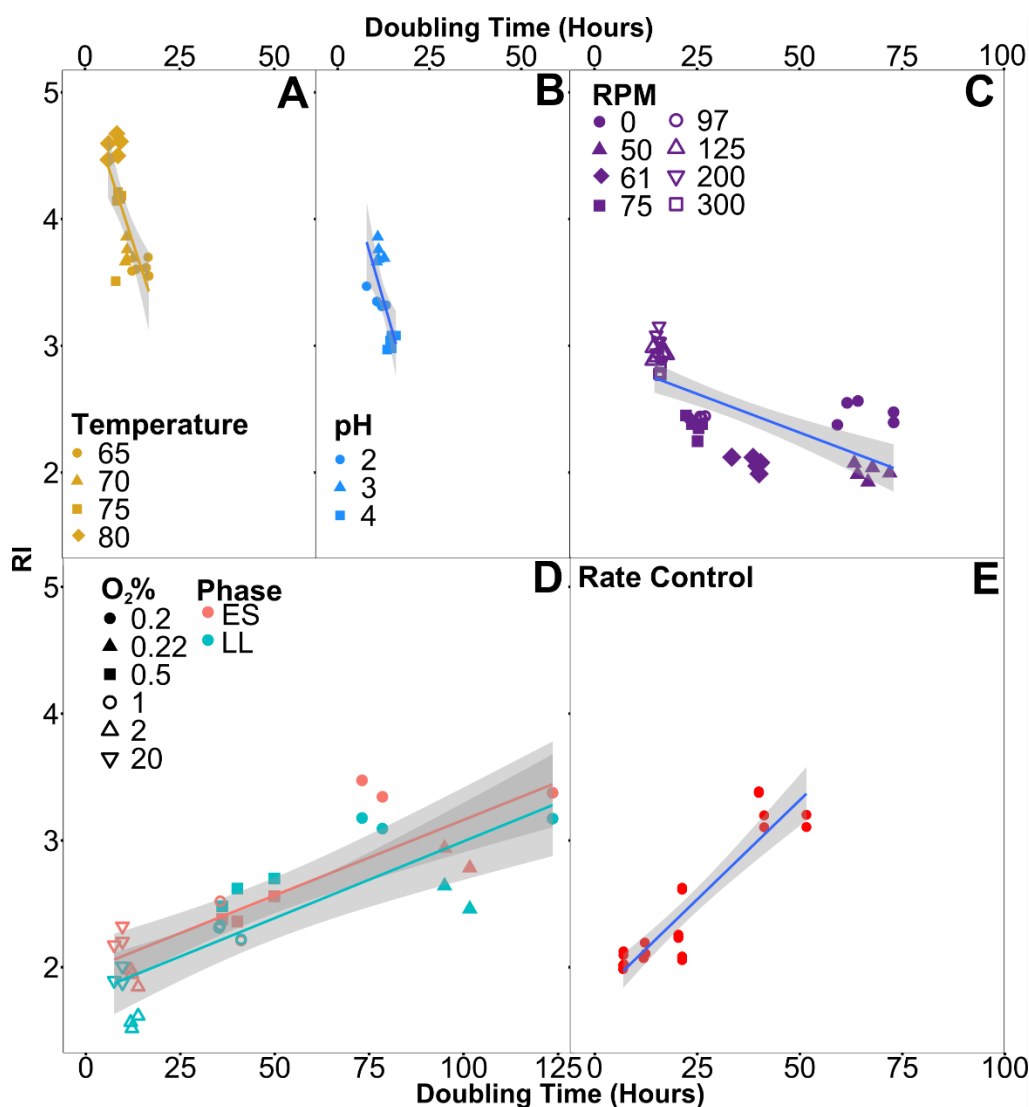

402

403 **Figure 4.** Ring index vs. doubling time. All biological replicates are shown, with experiments  
 404 differentiated by shape in each condition. Batch experiments (A-C) only varied a single  
 405 parameter relative to standard conditions at 70°C, pH 3, 200 RPM. In gas-fed batch experiments  
 406 (D), lipid samples taken for GDGT analysis during each of the two sampled growth phases are  
 407 identified by color, and 0.2\* represents the serially transferred 0.2% O<sub>2</sub> experiment. Data from  
 408 constant-rate experiments performed with the same strain (E) are provided for comparison (data  
 409 from Zhou et al. 2019). Linear regressions for each experiment have grey shaded regions  
 410 showing 95% confidence interval (A: slope =  $-0.10 \pm 0.01$ ,  $p < 0.0001$ ,  $R^2 = 0.64$ ; B: slope  
 411 =  $-0.147 \pm 0.03$ ,  $p < 0.001$ ,  $R^2 = 0.62$ ; C: slope =  $-0.011 \pm 0.0017$ ,  $p < 0.0001$ ,  $R^2 = 0.53$ ; D: slope  
 412 =  $0.120 \pm 0.0015$ ,  $p < 0.0001$ ,  $R^2 = 0.68$ ; E: slope =  $0.031 \pm 0.0031$ ,  $p < 0.0001$ ,  $R^2 = 0.82$ ).

413

414 **Figure**

5:

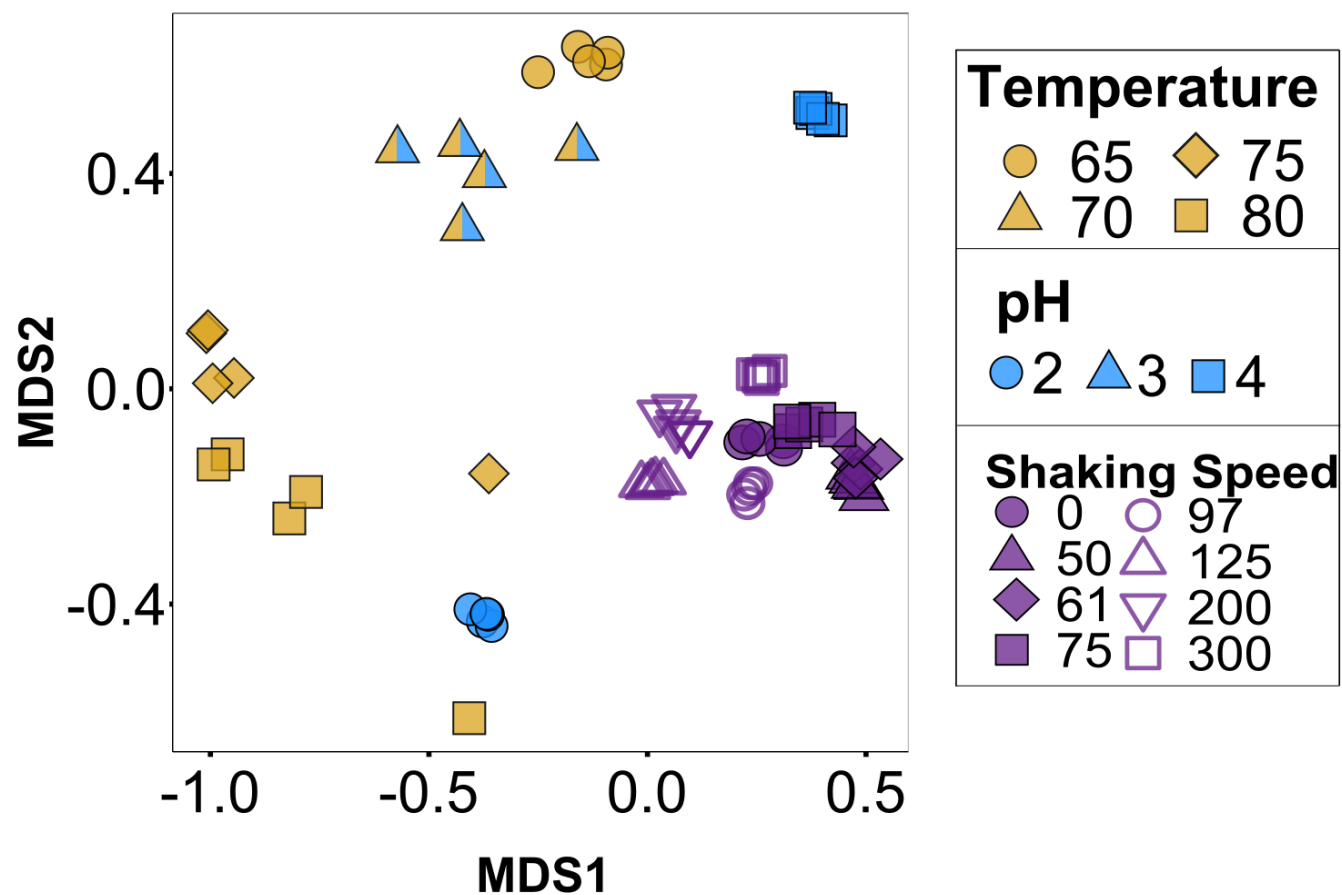

415

416 **Figure 5.** Clustering of GDGT composition in batch experiments color coded by change in  
417 growth condition. Experiments were performed at 70°C, pH=3, 200 RPM, with a change in only  
418 the individual condition described in the legend. NMDS is based on abundance of hydrolyzed  
419 core GDGT lipids using Bray Curtis dissimilarity (stress = 0.043).

420

421 **Figure 6:**

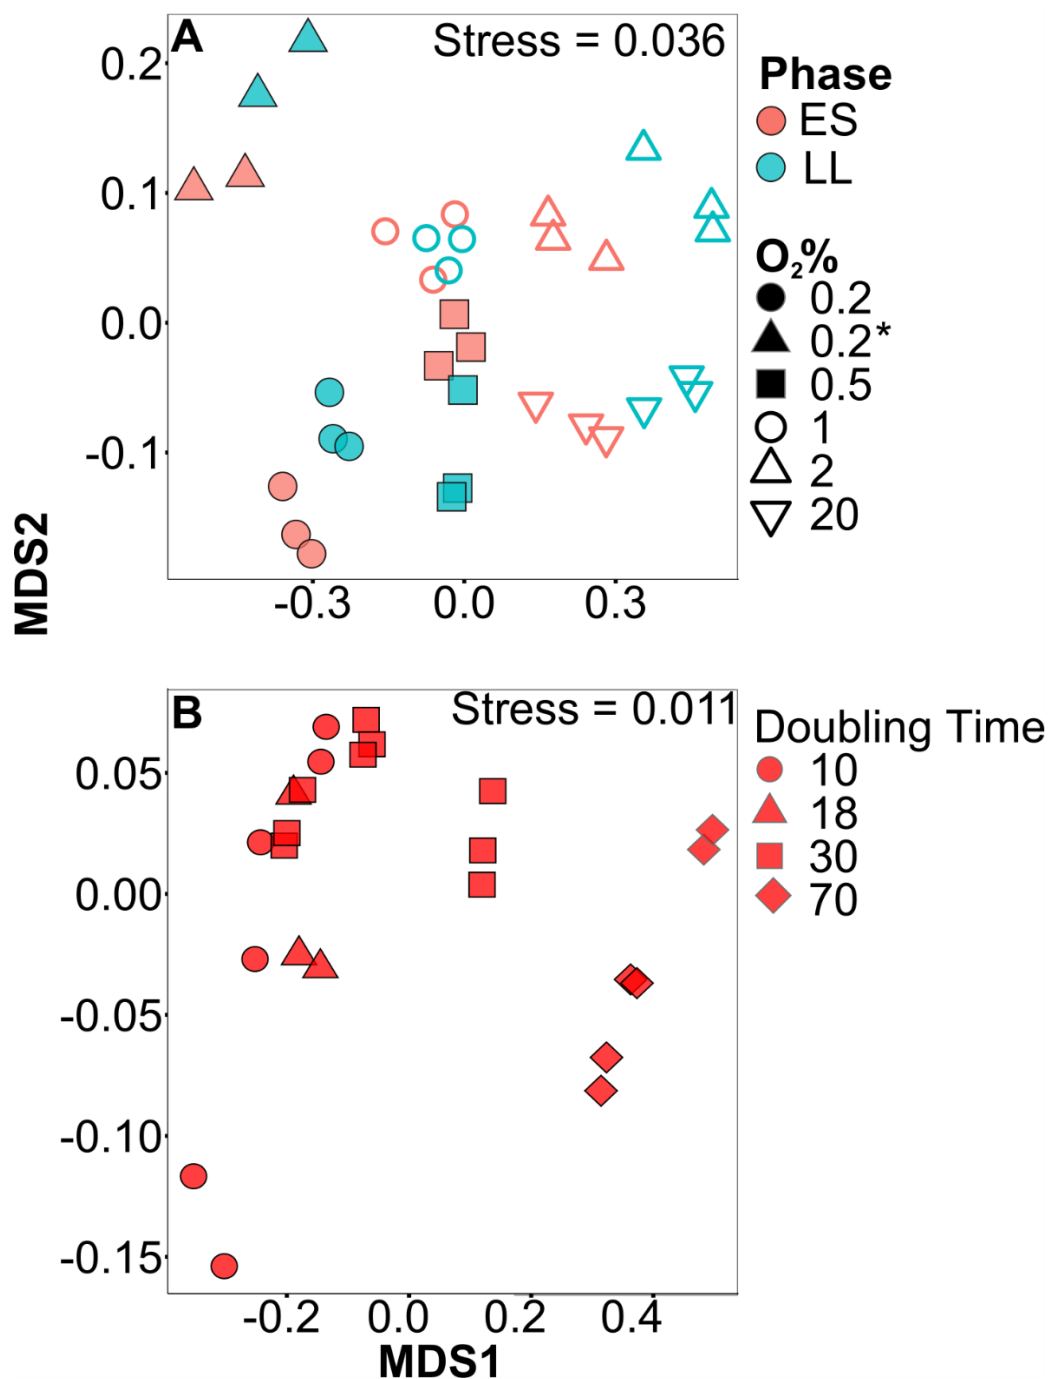

422 **Figure 6.** Clustering of GDGT composition in fed-batch and chemostat experiments. Clustering  
423 based on NMDS of abundance of hydrolyzed core GDGT lipids using Bray Curtis dissimilarity.  
424 Stress for each NMDS is reported in the top right of a given panel. Gas-fed batch experiments  
425 are arranged by symbol for experimental type and color for growth phase of collected sample  
426 (A). Data in (B) are from Zhou et al. (2019) and show effects of different doubling times as  
427 controlled by chemostat (B).  
428

429

430 Figure S1

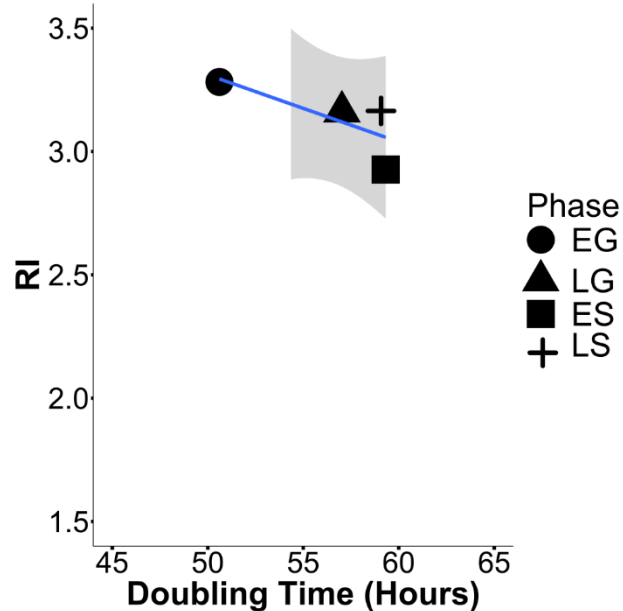

431

432 **Figure S1.** Ring Index vs. Doubling Time (GDGT 0-4, Cren and Cren-regioisomer treated as  
433 GDGT-5) in *Nitrosopumulis maritimus* based on growth phase experiments in Elling et al., 2014.  
434 Calculated growth rates are slightly different depending on the phase, but do not exhibit a large  
435 spread. Early growth may show the highest rate due to the few measurements that comprise  
436 that data (slope =  $-0.027 \pm 0.017$ ,  $p = 0.25$ ,  $R^2 = 0.34$ ).

437 Figure S2

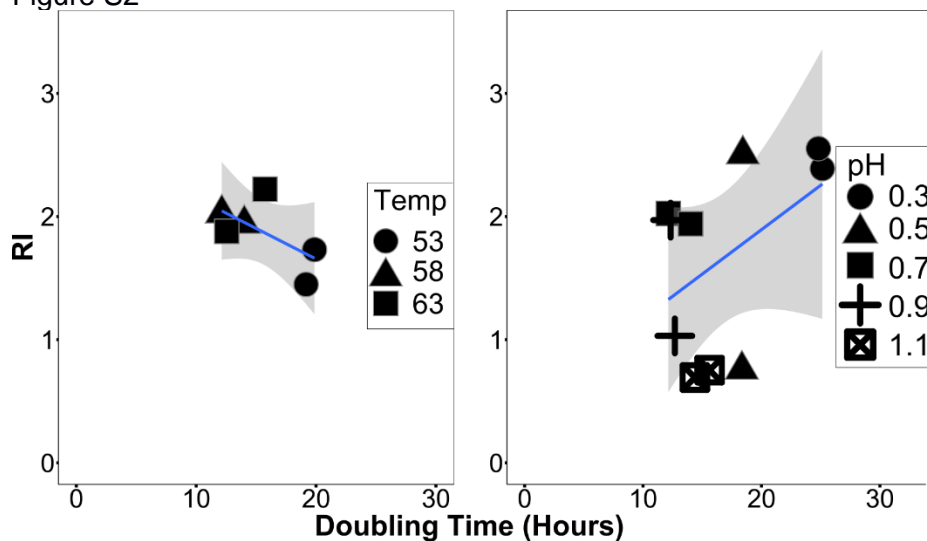

438  
439

440 **Figure S2.** Ring Index vs. Growth Rate(GDGT 0-8) in *Picrophilus torridus*, based on work of  
441 Feyhl-Buska 2016. Temperature experiments were performed at a single pH and pH  
442 experiments were performed isothermally (A: slope =  $-0.05 \pm 0.03$ ,  $p = 0.19$ ,  $R^2 = 0.23$ ; B: slope  
443 =  $0.07 \pm 0.05$ ,  $p = 0.19$ ,  $R^2 = 0.11$ ).



444

**Table S1: GDGT compositions across all experiment conditions and sampling times**

| Temp | RPM | pH | O2          | Phase | GDGT-0 | GDGT-1 | GDGT-2 | GDGT-3 | GDGT-3 iso | GDGT-4 | GDGT-4 iso | GDGT-5 | GDGT-5 iso | GDGT-6 | GDGT-7 | GDGT-8 | RI   |
|------|-----|----|-------------|-------|--------|--------|--------|--------|------------|--------|------------|--------|------------|--------|--------|--------|------|
| 70   | 200 | 2  | Atmospheric | ES    | 1.17   | 5.14   | 22.65  | 19.44  | 7.31       | 7.88   | 14.01      | 11.37  | 4.27       | 6.72   | 0.05   | 0.00   | 3.32 |
| 70   | 200 | 2  | Atmospheric | ES    | 1.20   | 5.20   | 23.44  | 19.77  | 7.41       | 7.40   | 14.55      | 10.71  | 4.15       | 6.14   | 0.04   | 0.00   | 3.32 |
| 70   | 200 | 2  | Atmospheric | ES    | 1.42   | 5.94   | 23.39  | 19.09  | 6.85       | 8.28   | 13.69      | 11.18  | 3.88       | 6.23   | 0.04   | 0.00   | 3.31 |
| 70   | 200 | 2  | Atmospheric | ES    | 1.09   | 4.65   | 20.59  | 19.27  | 6.24       | 8.85   | 14.45      | 13.30  | 4.02       | 7.49   | 0.05   | 0.00   | 3.47 |
| 70   | 200 | 2  | Atmospheric | ES    | 1.08   | 4.83   | 23.31  | 20.05  | 6.79       | 8.49   | 13.49      | 11.74  | 3.98       | 6.20   | 0.04   | 0.00   | 3.35 |
| 65   | 200 | 3  | Atmospheric | ES    | 0.35   | 1.42   | 9.43   | 21.62  | 0.00       | 62.25  | 0.00       | 4.78   | 0.00       | 0.15   | 0.01   | 0.00   | 3.62 |
| 65   | 200 | 3  | Atmospheric | ES    | 0.25   | 1.30   | 8.19   | 18.53  | 0.00       | 62.38  | 0.00       | 9.03   | 0.00       | 0.31   | 0.00   | 0.00   | 3.59 |
| 65   | 200 | 3  | Atmospheric | ES    | 0.32   | 1.62   | 11.19  | 23.53  | 0.00       | 56.42  | 0.00       | 6.68   | 0.00       | 0.23   | 0.00   | 0.00   | 3.70 |
| 65   | 200 | 3  | Atmospheric | ES    | 0.29   | 1.43   | 10.08  | 22.13  | 0.00       | 58.26  | 0.00       | 7.55   | 0.00       | 0.25   | 0.00   | 0.00   | 3.55 |
| 65   | 200 | 3  | Atmospheric | ES    | 0.27   | 1.46   | 10.50  | 22.38  | 0.00       | 57.16  | 0.00       | 7.96   | 0.00       | 0.27   | 0.00   | 0.00   | 3.60 |
| 70   | 200 | 3  | Atmospheric | ES    | 0.29   | 0.88   | 5.88   | 17.15  | 0.00       | 55.21  | 2.76       | 16.67  | 0.00       | 1.14   | 0.01   | 0.00   | 3.86 |
| 70   | 200 | 3  | Atmospheric | ES    | 0.28   | 1.24   | 8.34   | 17.43  | 0.00       | 54.17  | 3.13       | 15.30  | 0.00       | 0.00   | 0.11   | 0.00   | 3.76 |
| 70   | 200 | 3  | Atmospheric | ES    | 0.39   | 1.67   | 10.63  | 22.22  | 0.00       | 44.72  | 3.89       | 15.23  | 0.00       | 1.23   | 0.01   | 0.00   | 3.66 |
| 70   | 200 | 3  | Atmospheric | ES    | 0.30   | 1.24   | 9.01   | 21.68  | 0.00       | 51.19  | 2.85       | 13.61  | 0.00       | 0.11   | 0.00   | 0.00   | 3.68 |
| 70   | 200 | 3  | Atmospheric | ES    | 0.32   | 1.45   | 9.68   | 20.80  | 0.00       | 50.07  | 2.16       | 15.47  | 0.00       | 0.00   | 0.05   | 0.00   | 3.69 |
| 75   | 200 | 3  | Atmospheric | ES    | 0.34   | 1.28   | 7.92   | 11.20  | 1.10       | 33.09  | 6.47       | 30.52  | 0.84       | 6.84   | 0.35   | 0.05   | 4.14 |
| 75   | 200 | 3  | Atmospheric | ES    | 0.28   | 1.04   | 6.73   | 11.54  | 1.16       | 32.97  | 4.95       | 30.90  | 1.62       | 8.35   | 0.40   | 0.06   | 4.21 |
| 75   | 200 | 3  | Atmospheric | ES    | 0.32   | 1.26   | 7.19   | 12.19  | 0.00       | 32.29  | 5.56       | 32.35  | 0.80       | 7.61   | 0.38   | 0.06   | 4.18 |
| 75   | 200 | 3  | Atmospheric | ES    | 0.51   | 2.30   | 16.76  | 23.93  | 3.19       | 20.99  | 10.49      | 17.26  | 0.97       | 3.60   | 0.00   | 0.00   | 3.51 |
| 75   | 200 | 3  | Atmospheric | ES    | 0.30   | 1.11   | 6.71   | 12.65  | 0.00       | 33.73  | 6.86       | 30.84  | 0.81       | 6.52   | 0.43   | 0.06   | 4.16 |
| 80   | 200 | 3  | Atmospheric | ES    | 0.38   | 1.18   | 6.78   | 9.40   | 1.73       | 15.84  | 7.19       | 36.55  | 3.52       | 17.16  | 0.25   | 0.04   | 4.50 |
| 80   | 200 | 3  | Atmospheric | ES    | 0.38   | 0.98   | 5.88   | 7.78   | 1.48       | 15.86  | 7.37       | 37.08  | 3.66       | 19.48  | 0.01   | 0.03   | 4.60 |
| 80   | 200 | 3  | Atmospheric | ES    | 0.39   | 1.05   | 5.73   | 8.79   | 1.43       | 14.40  | 6.74       | 36.05  | 4.41       | 20.71  | 0.25   | 0.05   | 4.61 |
| 80   | 200 | 3  | Atmospheric | ES    | 0.48   | 1.30   | 6.81   | 10.79  | 1.64       | 14.72  | 9.26       | 29.98  | 5.27       | 19.74  | 0.00   | 0.00   | 4.47 |
| 80   | 200 | 3  | Atmospheric | ES    | 0.51   | 2.91   | 0.43   | 11.14  | 1.72       | 21.94  | 8.10       | 34.31  | 3.43       | 15.40  | 0.09   | 0.01   | 4.67 |
| 70   | 200 | 4  | Atmospheric | ES    | 0.98   | 4.23   | 24.57  | 32.16  | 0.00       | 35.74  | 0.00       | 2.28   | 0.00       | 0.05   | 0.00   | 0.00   | 3.08 |
| 70   | 200 | 4  | Atmospheric | ES    | 1.07   | 4.65   | 26.94  | 32.58  | 0.00       | 33.01  | 0.00       | 1.71   | 0.00       | 0.04   | 0.00   | 0.00   | 2.98 |
| 70   | 200 | 4  | Atmospheric | ES    | 0.87   | 3.72   | 23.92  | 31.90  | 0.00       | 37.60  | 0.00       | 1.94   | 0.00       | 0.05   | 0.00   | 0.00   | 3.08 |
| 70   | 200 | 4  | Atmospheric | ES    | 1.05   | 4.68   | 26.64  | 32.33  | 0.00       | 33.28  | 0.00       | 2.00   | 0.00       | 0.04   | 0.00   | 0.00   | 3.04 |
| 70   | 200 | 4  | Atmospheric | ES    | 0.85   | 3.87   | 23.53  | 32.38  | 0.00       | 37.06  | 0.00       | 2.27   | 0.00       | 0.04   | 0.00   | 0.00   | 2.97 |

|    |     |   |             |    |       |       |       |       |      |       |      |      |      |      |      |      |      |
|----|-----|---|-------------|----|-------|-------|-------|-------|------|-------|------|------|------|------|------|------|------|
| 70 | 0   | 3 | Atmospheric | ES | 5.59  | 16.99 | 31.53 | 25.16 | 1.16 | 15.73 | 1.75 | 1.95 | 0.04 | 0.10 | 0.00 | 0.00 | 2.39 |
| 70 | 0   | 3 | Atmospheric | ES | 4.31  | 14.17 | 31.30 | 25.07 | 1.66 | 17.34 | 2.34 | 3.55 | 0.07 | 0.20 | 0.00 | 0.00 | 2.55 |
| 70 | 0   | 3 | Atmospheric | ES | 5.44  | 16.63 | 33.73 | 24.14 | 1.36 | 14.98 | 1.66 | 1.95 | 0.04 | 0.09 | 0.00 | 0.00 | 2.38 |
| 70 | 0   | 3 | Atmospheric | ES | 4.45  | 15.00 | 33.16 | 25.01 | 1.35 | 16.20 | 1.87 | 2.74 | 0.05 | 0.17 | 0.00 | 0.00 | 2.48 |
| 70 | 0   | 3 | Atmospheric | ES | 3.61  | 12.95 | 32.80 | 26.78 | 1.42 | 16.98 | 2.14 | 3.07 | 0.07 | 0.19 | 0.00 | 0.00 | 2.56 |
| 70 | 50  | 3 | Atmospheric | ES | 8.27  | 21.98 | 35.25 | 22.62 | 1.19 | 9.15  | 0.90 | 0.59 | 0.02 | 0.03 | 0.00 | 0.00 | 2.07 |
| 70 | 50  | 3 | Atmospheric | ES | 9.24  | 23.82 | 35.76 | 20.93 | 1.09 | 7.74  | 0.86 | 0.52 | 0.02 | 0.03 | 0.00 | 0.00 | 1.99 |
| 70 | 50  | 3 | Atmospheric | ES | 10.42 | 24.40 | 36.04 | 19.87 | 1.11 | 6.84  | 0.80 | 0.48 | 0.02 | 0.03 | 0.00 | 0.00 | 1.93 |
| 70 | 50  | 3 | Atmospheric | ES | 8.27  | 22.62 | 36.60 | 21.53 | 1.15 | 8.32  | 0.87 | 0.58 | 0.02 | 0.03 | 0.00 | 0.00 | 2.04 |
| 70 | 50  | 3 | Atmospheric | ES | 9.49  | 23.22 | 35.71 | 20.89 | 1.09 | 8.13  | 0.87 | 0.56 | 0.02 | 0.03 | 0.00 | 0.00 | 2.00 |
| 70 | 61  | 3 | Atmospheric | ES | 6.87  | 21.29 | 36.88 | 22.47 | 1.12 | 9.92  | 0.81 | 0.60 | 0.01 | 0.02 | 0.00 | 0.00 | 2.12 |
| 70 | 61  | 3 | Atmospheric | ES | 7.24  | 21.93 | 37.33 | 22.30 | 1.06 | 8.82  | 0.77 | 0.52 | 0.01 | 0.02 | 0.00 | 0.00 | 2.08 |
| 70 | 61  | 3 | Atmospheric | ES | 7.47  | 22.71 | 37.24 | 21.84 | 1.15 | 8.13  | 0.85 | 0.55 | 0.02 | 0.03 | 0.00 | 0.00 | 2.05 |
| 70 | 61  | 3 | Atmospheric | ES | 8.66  | 23.23 | 37.85 | 20.93 | 0.55 | 7.55  | 0.72 | 0.45 | 0.01 | 0.02 | 0.00 | 0.00 | 1.99 |
| 70 | 61  | 3 | Atmospheric | ES | 7.07  | 20.74 | 37.37 | 22.77 | 0.69 | 9.65  | 0.97 | 0.69 | 0.02 | 0.03 | 0.00 | 0.00 | 2.12 |
| 70 | 75  | 3 | Atmospheric | ES | 4.65  | 15.80 | 35.48 | 25.77 | 0.97 | 14.15 | 1.37 | 1.71 | 0.03 | 0.07 | 0.00 | 0.00 | 2.38 |
| 70 | 75  | 3 | Atmospheric | ES | 4.48  | 15.62 | 35.95 | 25.73 | 0.88 | 14.56 | 1.26 | 1.43 | 0.02 | 0.06 | 0.00 | 0.00 | 2.38 |
| 70 | 75  | 3 | Atmospheric | ES | 4.48  | 15.82 | 37.55 | 25.17 | 0.80 | 13.78 | 1.11 | 1.23 | 0.02 | 0.05 | 0.00 | 0.00 | 2.35 |
| 70 | 75  | 3 | Atmospheric | ES | 4.02  | 13.87 | 35.45 | 27.28 | 0.94 | 15.31 | 1.43 | 1.60 | 0.03 | 0.07 | 0.00 | 0.00 | 2.45 |
| 70 | 75  | 3 | Atmospheric | ES | 4.99  | 17.71 | 38.96 | 24.47 | 0.79 | 11.17 | 0.97 | 0.90 | 0.01 | 0.04 | 0.00 | 0.00 | 2.25 |
| 70 | 97  | 3 | Atmospheric | ES | 3.41  | 12.03 | 39.65 | 27.11 | 2.16 | 10.42 | 2.81 | 2.20 | 0.08 | 0.14 | 0.00 | 0.00 | 2.44 |
| 70 | 97  | 3 | Atmospheric | ES | 3.14  | 12.31 | 40.38 | 26.67 | 2.61 | 8.71  | 3.64 | 2.28 | 0.09 | 0.17 | 0.00 | 0.00 | 2.43 |
| 70 | 97  | 3 | Atmospheric | ES | 3.44  | 12.26 | 39.59 | 26.68 | 2.38 | 9.48  | 3.39 | 2.52 | 0.09 | 0.18 | 0.00 | 0.00 | 2.44 |
| 70 | 97  | 3 | Atmospheric | ES | 3.54  | 12.17 | 40.11 | 26.74 | 2.16 | 9.62  | 3.09 | 2.33 | 0.08 | 0.16 | 0.00 | 0.00 | 2.43 |
| 70 | 97  | 3 | Atmospheric | ES | 3.20  | 13.09 | 38.37 | 27.22 | 2.11 | 10.51 | 2.95 | 2.33 | 0.08 | 0.15 | 0.00 | 0.00 | 2.45 |
| 70 | 125 | 3 | Atmospheric | ES | 1.49  | 6.79  | 30.21 | 29.63 | 2.85 | 14.82 | 6.52 | 6.83 | 0.18 | 0.69 | 0.00 | 0.00 | 2.89 |
| 70 | 125 | 3 | Atmospheric | ES | 1.46  | 5.97  | 28.73 | 30.29 | 3.01 | 14.33 | 7.18 | 7.94 | 0.24 | 0.83 | 0.00 | 0.00 | 2.95 |
| 70 | 125 | 3 | Atmospheric | ES | 1.23  | 5.57  | 28.13 | 30.60 | 2.94 | 14.45 | 7.39 | 8.52 | 0.27 | 0.90 | 0.00 | 0.00 | 2.99 |
| 70 | 125 | 3 | Atmospheric | ES | 1.42  | 5.78  | 29.67 | 30.70 | 2.81 | 14.25 | 6.70 | 7.62 | 0.23 | 0.83 | 0.00 | 0.00 | 2.94 |
| 70 | 125 | 3 | Atmospheric | ES | 1.42  | 6.15  | 29.80 | 30.59 | 2.78 | 14.41 | 6.57 | 7.31 | 0.22 | 0.74 | 0.00 | 0.00 | 2.92 |
| 70 | 200 | 3 | Atmospheric | ES | 0.72  | 3.94  | 26.50 | 33.67 | 1.86 | 22.81 | 3.96 | 6.14 | 0.09 | 0.31 | 0.00 | 0.00 | 3.04 |
| 70 | 200 | 3 | Atmospheric | ES | 1.12  | 5.43  | 28.37 | 32.97 | 1.84 | 19.90 | 4.16 | 5.81 | 0.08 | 0.32 | 0.00 | 0.00 | 2.94 |
| 70 | 200 | 3 | Atmospheric | ES | 0.74  | 3.34  | 23.37 | 32.52 | 1.66 | 24.86 | 4.70 | 8.22 | 0.10 | 0.48 | 0.00 | 0.00 | 3.15 |

|    |     |   |             |    |       |       |       |       |       |       |      |       |      |      |      |      |      |
|----|-----|---|-------------|----|-------|-------|-------|-------|-------|-------|------|-------|------|------|------|------|------|
| 70 | 200 | 3 | Atmospheric | ES | 0.76  | 3.65  | 24.80 | 33.96 | 1.47  | 24.28 | 4.09 | 6.57  | 0.08 | 0.34 | 0.00 | 0.00 | 3.08 |
| 70 | 200 | 3 | Atmospheric | ES | 0.84  | 4.04  | 26.51 | 33.72 | 1.96  | 21.85 | 4.29 | 6.31  | 0.09 | 0.37 | 0.00 | 0.00 | 3.03 |
| 70 | 300 | 3 | Atmospheric | ES | 1.00  | 6.04  | 33.31 | 33.81 | 0.99  | 20.83 | 1.74 | 2.20  | 0.02 | 0.06 | 0.00 | 0.00 | 2.79 |
| 70 | 300 | 3 | Atmospheric | ES | 0.93  | 5.78  | 32.38 | 32.46 | 1.03  | 23.16 | 1.80 | 2.39  | 0.02 | 0.07 | 0.00 | 0.00 | 2.83 |
| 70 | 300 | 3 | Atmospheric | ES | 1.12  | 6.64  | 33.12 | 32.91 | 0.94  | 21.33 | 1.75 | 2.11  | 0.02 | 0.06 | 0.00 | 0.00 | 2.78 |
| 70 | 300 | 3 | Atmospheric | ES | 1.11  | 6.84  | 32.93 | 33.45 | 0.91  | 21.22 | 1.59 | 1.89  | 0.02 | 0.05 | 0.00 | 0.00 | 2.77 |
| 70 | 300 | 3 | Atmospheric | ES | 1.22  | 6.45  | 33.47 | 33.15 | 0.99  | 20.71 | 1.74 | 2.19  | 0.02 | 0.06 | 0.00 | 0.00 | 2.77 |
| 70 | NA  | 3 | 0.2         | ES | 1.46  | 4.14  | 12.21 | 26.77 | 1.68  | 42.60 | 2.74 | 8.02  | 0.06 | 0.32 | 0.00 | 0.00 | 3.38 |
| 70 | NA  | 3 | 0.2         | ES | 1.59  | 4.58  | 12.19 | 23.99 | 3.87  | 45.87 | 1.37 | 6.31  | 0.04 | 0.20 | 0.00 | 0.00 | 3.34 |
| 70 | NA  | 3 | 0.2         | ES | 1.10  | 3.10  | 10.27 | 22.84 | 4.12  | 47.89 | 2.38 | 7.91  | 0.08 | 0.30 | 0.00 | 0.00 | 3.47 |
| 70 | NA  | 3 | 0.2         | LL | 1.83  | 5.32  | 15.77 | 31.08 | 1.96  | 37.60 | 1.57 | 4.61  | 0.08 | 0.19 | 0.00 | 0.00 | 3.17 |
| 70 | NA  | 3 | 0.2         | LL | 2.39  | 6.81  | 17.46 | 27.46 | 2.64  | 37.78 | 1.32 | 3.96  | 0.06 | 0.15 | 0.00 | 0.00 | 3.09 |
| 70 | NA  | 3 | 0.2         | LL | 1.72  | 5.25  | 16.18 | 29.23 | 2.83  | 38.02 | 2.20 | 4.29  | 0.09 | 0.19 | 0.00 | 0.00 | 3.18 |
| 70 | NA  | 3 | 0.2*        | ES | 2.54  | 6.87  | 16.42 | 23.70 | 31.34 | 3.27  | 3.89 | 11.18 | 0.16 | 0.64 | 0.00 | 0.00 | 2.94 |
| 70 | NA  | 3 | 0.2*        | ES | 3.29  | 8.78  | 20.57 | 26.96 | 22.93 | 4.82  | 4.16 | 7.98  | 0.13 | 0.37 | 0.00 | 0.00 | 2.78 |
| 70 | NA  | 3 | 0.2*        | LL | 3.76  | 9.24  | 22.09 | 29.82 | 25.00 | 1.84  | 2.68 | 5.18  | 0.08 | 0.30 | 0.00 | 0.00 | 2.64 |
| 70 | NA  | 3 | 0.2*        | LL | 4.46  | 12.55 | 27.32 | 28.45 | 19.44 | 1.56  | 2.41 | 3.58  | 0.05 | 0.19 | 0.00 | 0.00 | 2.46 |
| 70 | NA  | 3 | 0.5         | ES | 4.87  | 15.97 | 35.74 | 25.44 | 1.57  | 13.49 | 1.47 | 1.35  | 0.04 | 0.07 | 0.00 | 0.00 | 2.36 |
| 70 | NA  | 3 | 0.5         | ES | 3.42  | 12.54 | 32.88 | 27.73 | 1.39  | 18.83 | 1.45 | 1.64  | 0.04 | 0.07 | 0.00 | 0.00 | 2.56 |
| 70 | NA  | 3 | 0.5         | ES | 4.50  | 15.32 | 35.92 | 26.29 | 0.91  | 14.49 | 1.31 | 1.16  | 0.03 | 0.06 | 0.00 | 0.00 | 2.38 |
| 70 | NA  | 3 | 0.5         | LL | 4.01  | 11.78 | 27.72 | 31.72 | 0.65  | 21.99 | 0.73 | 1.32  | 0.02 | 0.07 | 0.00 | 0.00 | 2.62 |
| 70 | NA  | 3 | 0.5         | LL | 3.12  | 10.54 | 27.63 | 31.06 | 0.92  | 24.58 | 0.77 | 1.29  | 0.02 | 0.07 | 0.00 | 0.00 | 2.70 |
| 70 | NA  | 3 | 0.5         | LL | 4.29  | 14.17 | 31.27 | 29.69 | 1.06  | 17.49 | 0.92 | 1.03  | 0.04 | 0.06 | 0.00 | 0.00 | 2.48 |
| 70 | NA  | 3 | 1           | ES | 4.39  | 13.56 | 31.55 | 28.59 | 1.35  | 14.74 | 2.71 | 2.87  | 0.09 | 0.16 | 0.00 | 0.00 | 2.52 |
| 70 | NA  | 3 | 1           | ES | 5.58  | 16.64 | 35.64 | 25.02 | 1.54  | 12.09 | 1.60 | 1.75  | 0.06 | 0.09 | 0.00 | 0.00 | 2.32 |
| 70 | NA  | 3 | 1           | ES | 5.90  | 17.87 | 39.24 | 22.47 | 1.98  | 9.21  | 1.93 | 1.28  | 0.05 | 0.06 | 0.00 | 0.00 | 2.21 |
| 70 | NA  | 3 | 1           | LL | 5.99  | 17.26 | 32.81 | 25.75 | 1.83  | 12.08 | 2.32 | 1.79  | 0.07 | 0.10 | 0.00 | 0.00 | 2.33 |
| 70 | NA  | 3 | 1           | LL | 5.96  | 17.41 | 33.72 | 25.50 | 1.28  | 12.54 | 1.93 | 1.53  | 0.05 | 0.07 | 0.00 | 0.00 | 2.31 |
| 70 | NA  | 3 | 1           | LL | 6.04  | 18.18 | 37.27 | 24.03 | 1.67  | 9.59  | 1.83 | 1.27  | 0.05 | 0.06 | 0.00 | 0.00 | 2.22 |
| 70 | NA  | 3 | 2           | ES | 10.55 | 25.40 | 39.17 | 18.08 | 1.05  | 4.69  | 0.72 | 0.31  | 0.01 | 0.01 | 0.00 | 0.00 | 1.84 |
| 70 | NA  | 3 | 2           | ES | 10.02 | 23.81 | 36.71 | 19.73 | 1.49  | 6.46  | 1.17 | 0.57  | 0.02 | 0.02 | 0.00 | 0.00 | 1.94 |
| 70 | NA  | 3 | 2           | ES | 8.36  | 23.14 | 39.46 | 19.47 | 1.40  | 6.57  | 1.02 | 0.54  | 0.02 | 0.02 | 0.00 | 0.00 | 1.98 |
| 70 | NA  | 3 | 2           | LL | 14.86 | 30.32 | 37.55 | 13.07 | 0.25  | 3.37  | 0.31 | 0.24  | 0.01 | 0.02 | 0.00 | 0.00 | 1.61 |

|    |    |   |    |    |       |       |       |       |      |       |      |      |      |      |      |      |      |
|----|----|---|----|----|-------|-------|-------|-------|------|-------|------|------|------|------|------|------|------|
| 70 | NA | 3 | 2  | LL | 17.76 | 31.65 | 34.97 | 12.23 | 0.32 | 2.70  | 0.24 | 0.12 | 0.00 | 0.01 | 0.00 | 0.00 | 1.52 |
| 70 | NA | 3 | 2  | LL | 16.10 | 30.65 | 36.95 | 12.99 | 0.35 | 2.59  | 0.26 | 0.11 | 0.00 | 0.01 | 0.00 | 0.00 | 1.57 |
| 70 | NA | 3 | 20 | ES | 4.77  | 18.70 | 40.66 | 25.81 | 0.61 | 8.50  | 0.61 | 0.32 | 0.01 | 0.01 | 0.00 | 0.00 | 2.17 |
| 70 | NA | 3 | 20 | ES | 5.01  | 19.22 | 37.79 | 26.21 | 0.74 | 9.83  | 0.74 | 0.42 | 0.01 | 0.01 | 0.00 | 0.00 | 2.20 |
| 70 | NA | 3 | 20 | ES | 3.89  | 16.56 | 37.41 | 27.59 | 0.90 | 11.81 | 1.05 | 0.77 | 0.01 | 0.02 | 0.00 | 0.00 | 2.32 |
| 70 | NA | 3 | 20 | LL | 8.88  | 24.84 | 39.95 | 20.53 | 0.34 | 4.99  | 0.30 | 0.15 | 0.00 | 0.01 | 0.00 | 0.00 | 1.89 |
| 70 | NA | 3 | 20 | LL | 10.64 | 24.69 | 37.17 | 21.26 | 0.38 | 5.38  | 0.32 | 0.14 | 0.00 | 0.01 | 0.00 | 0.00 | 1.88 |
| 70 | NA | 3 | 20 | LL | 8.16  | 22.50 | 38.00 | 22.94 | 0.48 | 7.12  | 0.53 | 0.25 | 0.00 | 0.01 | 0.00 | 0.00 | 2.01 |

445  
446  
447  
448  
449  
450

GDGT relative abundances. In the O<sub>2</sub> column, "Atmospheric" is used to describe experiments without gas sparge, and 0.2\* is used to describe the serially transferred 0.2% O<sub>2</sub> gas-fed batch experiment. ES and LL in the Phase column describe Early Stationary and Late Log phase sampling respectively.
